# Supplementary material
Source: publisher figshare collection journal article supplement (https://frontiersin.figshare.com/ndownloader/files/12299798)
Supplement: Supplementary file [file 12299798]

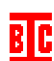

Brookhaven Instruments Corp.  
ZetaPals Particle Sizing Software Ver. 3.86

Date: Feb 2, 2018  
Time: 09:11:22  
Batch: 0

Sample ID **AgNPs-Hellma-CUV-plastica (Combined)**

Operator ID **Luca**

Notes **2018-02-02**

Measurement Parameters:

|                 |                         |                    |              |
|-----------------|-------------------------|--------------------|--------------|
| Temperature     | = 25.0 deg. C           | Runs Completed     | = 5          |
| Liquid          | = Water                 | Run Duration       | = 00:01:00   |
| Viscosity       | = 0.890 cP              | Total Elapsed Time | = 00:05:00   |
| Ref.Index Fluid | = 1.330                 | Average Count Rate | = 315.4 kcps |
| Angle           | = 90.00                 | Ref.Index Real     | = 1.000      |
| Wavelength      | = 660.0 nm              | Ref.Index Imag     | = 0.000      |
| Baseline        | = Auto (Slope Analysis) | Dust Filter        | = Off        |

AgNPs-Hellma-CUV-plastica (Combined)

**Effective Diameter: 32.7 nm**

**Polydispersity: 0.219**

**Baseline Index: 9.2**

**Elapsed Time: 00:05:00**

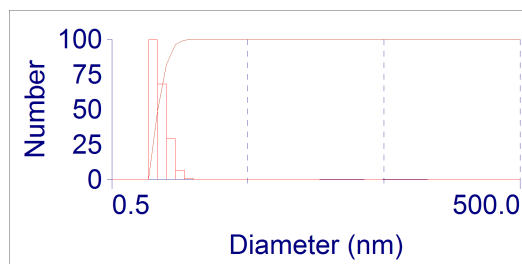

Multimodal Size Distribution

| Run        | Eff. Diam. (nm) | Half Width (nm) | Polydispersity | Baseline Index |
|------------|-----------------|-----------------|----------------|----------------|
| 1          | 32.9            | 15.6            | 0.224          | 8.8            |
| 2          | 33.2            | 15.6            | 0.220          | 8.7            |
| 3          | 33.2            | 15.8            | 0.227          | 9.4            |
| 4          | 32.5            | 15.1            | 0.215          | 9.8            |
| 5          | 31.7            | 14.4            | 0.208          | 9.5            |
| Mean       | 32.7            | 15.3            | 0.219          | 9.2            |
| Std. Error | 0.3             | 0.2             | 0.003          | 0.2            |
| Combined   | 32.7            | 15.3            | 0.219          | 9.2            |

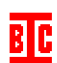

Brookhaven Instruments Corp.  
ZetaPals Particle Sizing Software Ver. 3.86

Date: Feb 2, 2018

Time: 09:11:22

Batch: 0

Sample ID **AgNPs-Hellma-CUV-plastica (Combined)**

Operator ID **Luca**

Notes **2018-02-02**

Elapsed Time 00:05:00  
Eff. Diam. 32.7 nm  
Mean Diam. 36.1 nm  
Polydispersity 0.219  
GSD 1.560

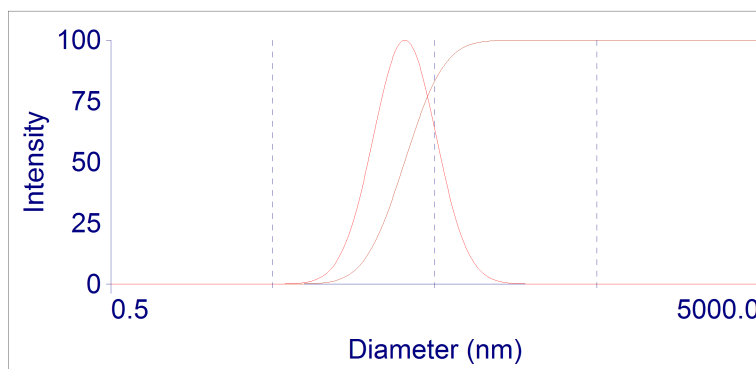

Lognormal Size Distribution

| r(nm) | G(r) | C(r) | d(nm) | G(d) | C(d) | d(nm) | G(d) | C(d) |
|-------|------|------|-------|------|------|-------|------|------|
| 15.7  | 26   | 5    | 29.2  | 97   | 40   | 44.1  | 80   | 75   |
| 18.5  | 44   | 10   | 30.9  | 99   | 45   | 47.5  | 70   | 80   |
| 20.6  | 58   | 15   | 32.7  | 100  | 50   | 51.8  | 58   | 85   |
| 22.5  | 70   | 20   | 34.6  | 99   | 55   | 57.8  | 44   | 90   |
| 24.2  | 80   | 25   | 36.6  | 97   | 60   | 67.9  | 26   | 95   |
| 25.9  | 87   | 30   | 38.8  | 93   | 65   |       |      |      |
| 27.5  | 93   | 35   | 41.3  | 87   | 70   |       |      |      |



Brookhaven Instruments Corp.  
ZetaPals Particle Sizing Software Ver. 3.86

Date: Feb 2, 2018

Time: 09:11:22

Batch: 0

Sample ID **AgNPs-Hellma-CUV-plastica (Combined)**

Operator ID **Luca**

Notes **2018-02-02**

Elapsed Time 00:05:00  
Mean Diam. 1.1 nm  
Rel. Var. 0.019  
Skew 1.574

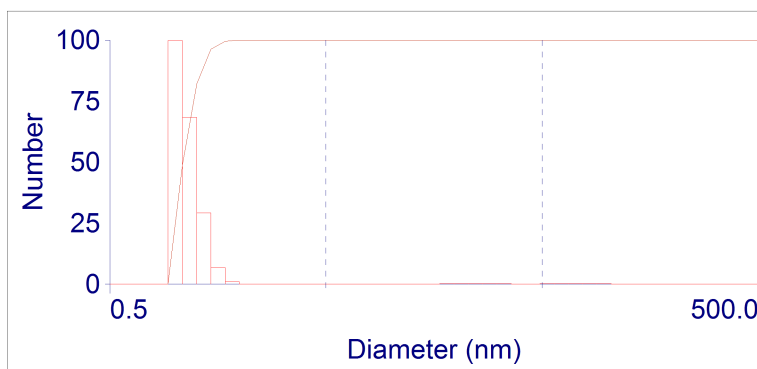

Multimodal Size Distribution

| d(nm) | G(d) | C(d) | d(nm) | G(d) | C(d) | d(nm) | G(d) | C(d) |
|-------|------|------|-------|------|------|-------|------|------|
| 1.0   | 100  | 49   | 5.3   | 0    | 100  | 28.5  | 0    | 100  |
| 1.2   | 68   | 82   | 6.2   | 0    | 100  | 33.2  | 0    | 100  |
| 1.4   | 29   | 96   | 7.2   | 0    | 100  | 38.7  | 0    | 100  |
| 1.6   | 7    | 100  | 8.4   | 0    | 100  | 45.0  | 0    | 100  |
| 1.8   | 1    | 100  | 9.8   | 0    | 100  | 52.4  | 0    | 100  |
| 2.1   | 0    | 100  | 11.4  | 0    | 100  | 61.0  | 0    | 100  |
| 2.5   | 0    | 100  | 13.3  | 0    | 100  | 71.1  | 0    | 100  |
| 2.9   | 0    | 100  | 15.5  | 0    | 100  | 82.8  | 0    | 100  |
| 3.4   | 0    | 100  | 18.1  | 0    | 100  | 96.4  | 0    | 100  |
| 3.9   | 0    | 100  | 21.0  | 0    | 100  | 112.2 | 0    | 100  |
| 4.6   | 0    | 100  | 24.5  | 0    | 100  | 130.7 | 0    | 100  |

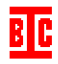

Brookhaven Instruments Corp.  
ZetaPals Particle Sizing Software Ver. 3.86

Date: Feb 2, 2018  
Time: 09:11:22  
Batch: 0

Sample ID **AgNPs-Hellma-CUV-plastica (Combined)**  
Operator ID **Luca**  
Notes **2018-02-02**

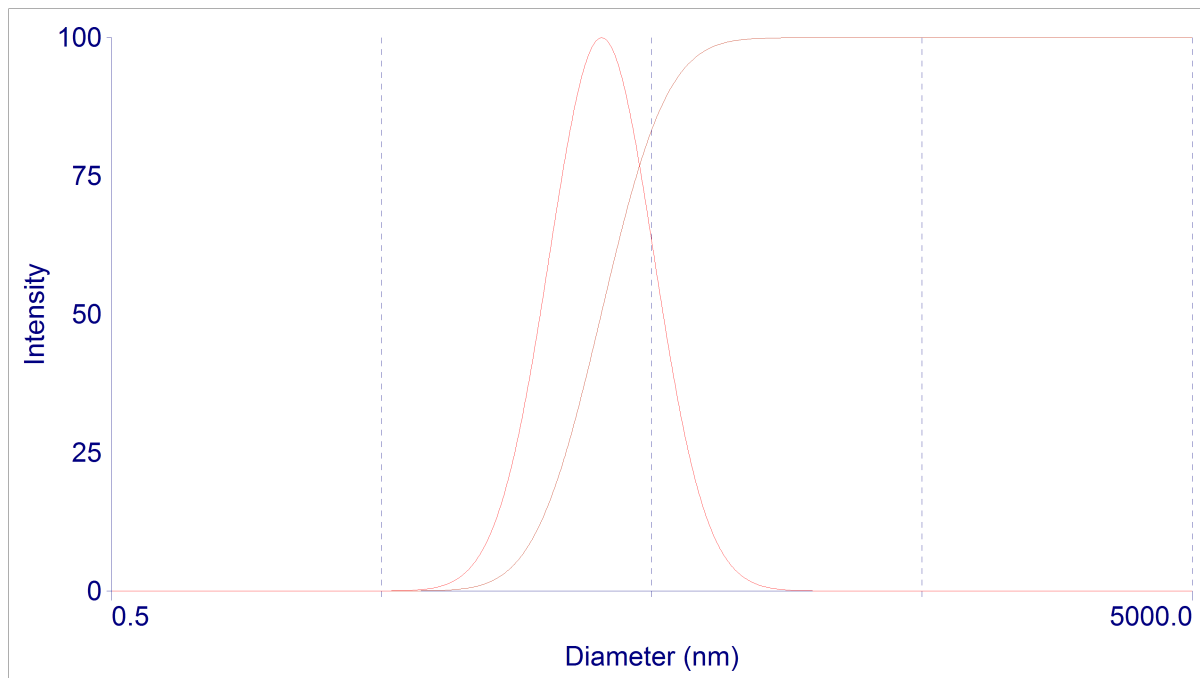

Lognormal Distribution

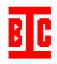

Brookhaven Instruments Corp.  
ZetaPals Particle Sizing Software Ver. 3.86

Date: Feb 2, 2018  
Time: 09:11:22  
Batch: 0

Sample ID **AgNPs-Hellma-CUV-plastica (Combined)**  
Operator ID **Luca**  
Notes **2018-02-02**

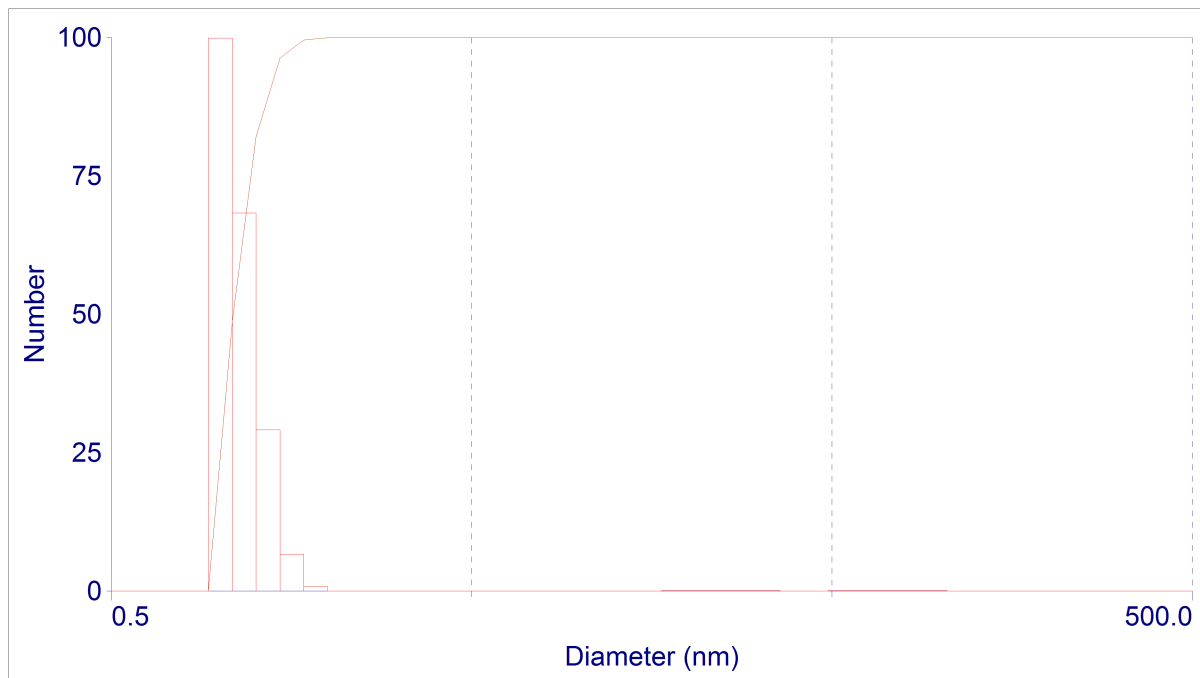

Multimodal Size Distribution



Brookhaven Instruments Corp.  
ZetaPals Particle Sizing Software Ver. 3.86

Date: Feb 2, 2018

Time: 09:11:22

Batch: 0

Sample ID **AgNPs-Hellma-CUV-plastica (Combined)**

Operator ID **Luca**

Notes **2018-02-02**

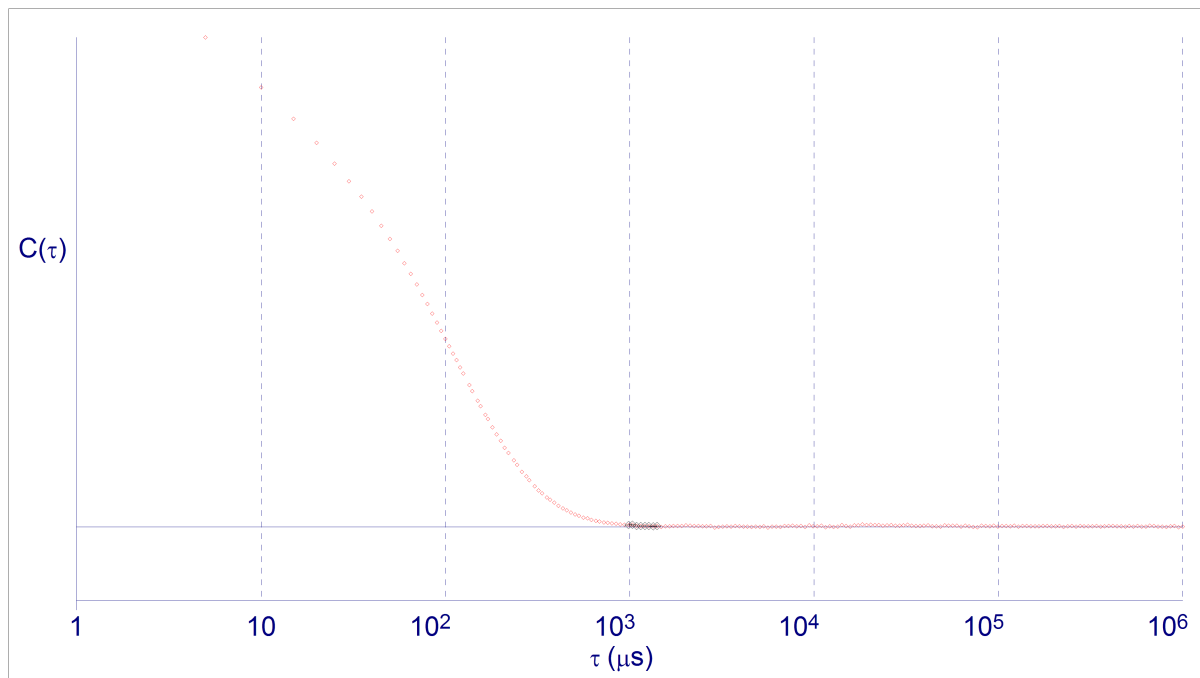

Correlation Function
